# Supplementary material for: Activation of CN bonds by high-valent group 6 metal chlorides, including the conversion of an α-diimine into a functionalized imidazolium
Source: Royal Society of Chemistry journal article supplement (doi:10.1039/c8nj00846a), 2018-01-01

# Activation of C=N Bonds by High Valent Group 6 Metal Chlorides, Including the Conversion of a $\alpha$ -Diimine into a Functionalized Imidazolium

N. Bartalucci, M. Bortoluzzi, S. Zacchini, G. Pampaloni and F. Marchetti

## Supporting Information

| <b><u>Table of contents</u></b>                                                                                                                                  | <i>Page</i> |
|------------------------------------------------------------------------------------------------------------------------------------------------------------------|-------------|
| <b>Figure SI-1.</b> DFT-optimized geometry of $[\text{DAD}^{\text{Me}}][\text{WCl}_6]$                                                                           | S2          |
| <b>Figure SI-2.</b> DFT-optimized geometry of $[\text{XylNCHCHN}(\text{Xyl})\text{CH}(\text{NXyl})\text{CHNXyl}]^{+\bullet}$                                     | S3          |
| <b>Figure SI-3.</b> DFT-optimized geometry of $[\text{XylNCHCHN}(\text{Xyl})\text{CH}(\text{NXyl})\text{CHNXyl}]^{2+}$                                           | S4          |
| <b>Figure SI-4.</b> DFT-optimized geometry of $[\text{WCl}_5\{\text{N}(\text{Ar})\text{C}(\text{CHNXyl})\text{NXylCHCHNXyl}\}]^+$                                | S5          |
| <b>Figure SI-5.</b> DFT-optimized geometry of $\text{W}(\text{NXyl})\text{Cl}_4$ and $[\text{XylNCHCHN}(\text{Xyl})\text{C}(\text{Cl})\text{CHNXyl}]^{+\bullet}$ | S6          |
| <b>Figure SI-6.</b> DFT-optimized geometry of $\text{W}(\text{NCIXyl})\text{Cl}_4$ and of the cation in <b>1</b>                                                 | S7          |

**Figure SI-1.** DFT-optimized geometry of  $[\text{DAD}^{\text{Me}}][\text{WCl}_6]$  (C-PCM/ $\omega$ B97X calculations) and spin density surface (isovalue = 0.01 a.u.). Hydrogen atoms on the Xyl moieties are omitted for clarity. Colour map: W, orange; Cl, green; N, blue; C, grey; H, white; spin density surface: yellow tones. Selected computed lengths (Å): C1-N1 1.265, C2-N2 1.258, C1-C2 1.494, W-Cl (average) 2.348, W---N1 5.302, W---N2 6.687.

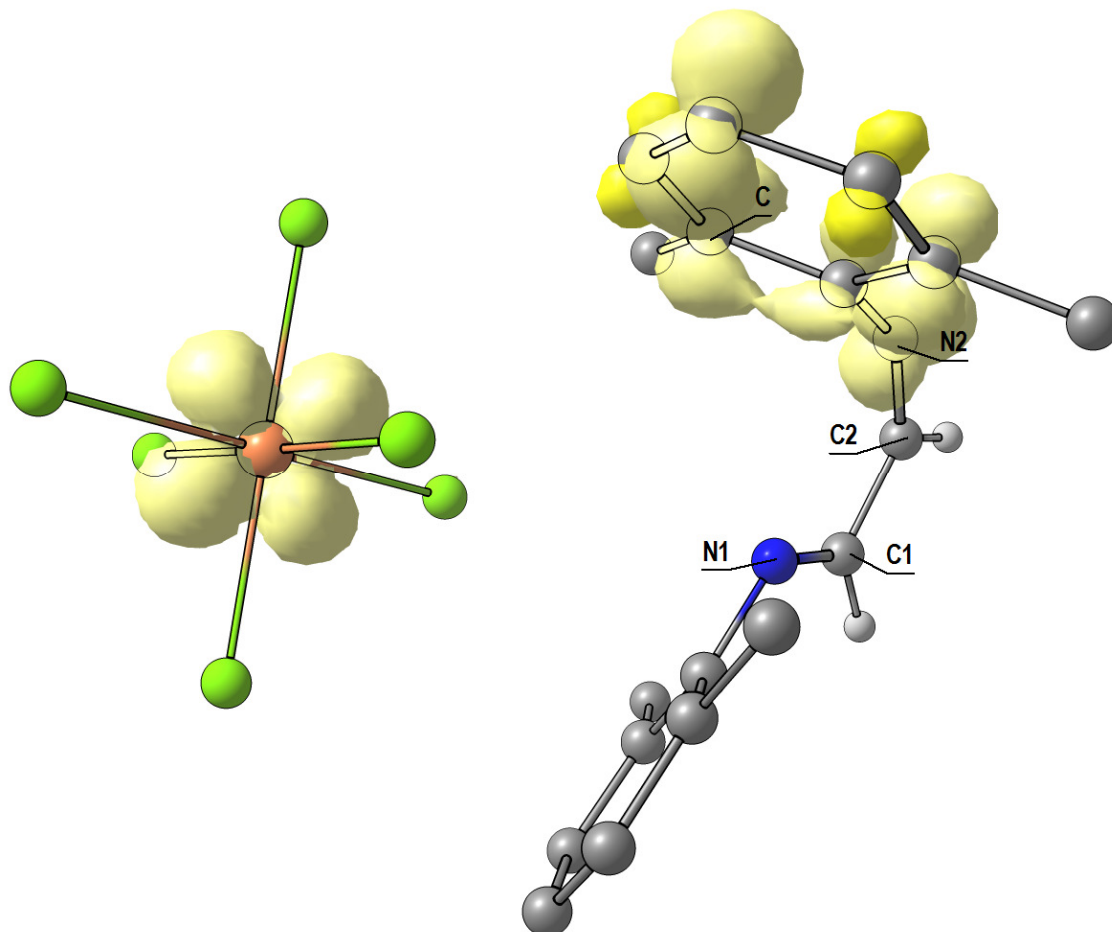

**Figure SI-2.** DFT-optimized geometry of  $[\text{XylINCHCHN}(\text{Xyl})\text{CH}(\text{NXyl})\text{CHNXyl}]^{+*}$  (C-PCM/ $\omega$ B97X calculations) and spin density surface (isovalue = 0.01 a.u.). Hydrogen atoms on the Xyl moieties are omitted for clarity. Colour map: N, blue; C, grey; H, white; spin density surface: yellow tones. Selected computed lengths (Å): C1-N1 1.258, C2-N2 1.425, C2-N3 1.492, C3-N3 1.288, C4-N4 1.268, C1-C2 1.529, C3-C4 1.471.

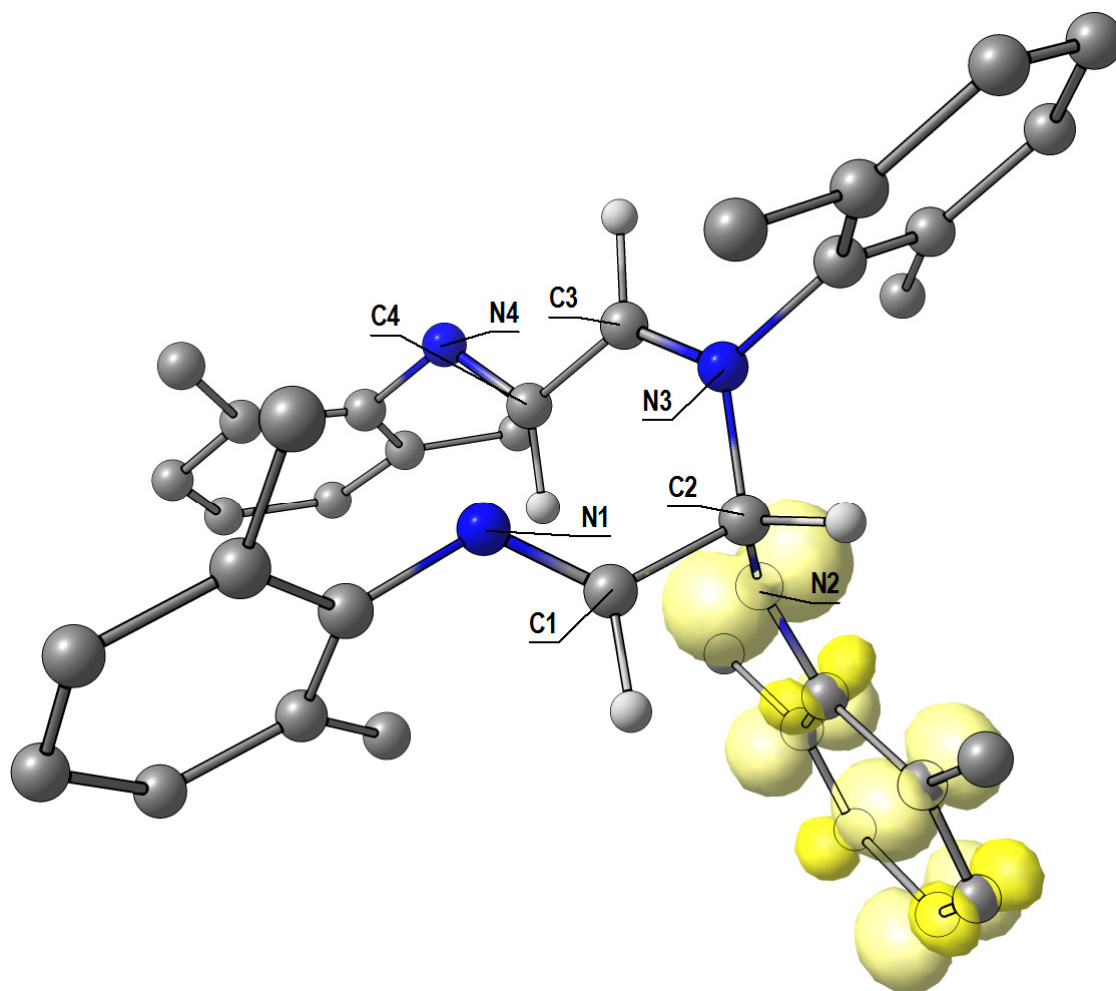

**Figure SI-3.** DFT-optimized geometry of  $[\text{XylINCHCHN}(\text{Xyl})\text{CH}(\text{NXyl})\text{CHNXyl}]^{2+}$  (C-PCM/ $\omega$ B97X calculations). Hydrogen atoms on the Xyl moieties are omitted for clarity. Colour map: N, blue; C, grey; H, white. Selected computed lengths (Å): C1-N1 1.253, C2-N2 1.429, C2-N3 1.481, C3-N3 1.293, C4-N4 1.269, C1-C2 1.541, C3-C4 1.467.

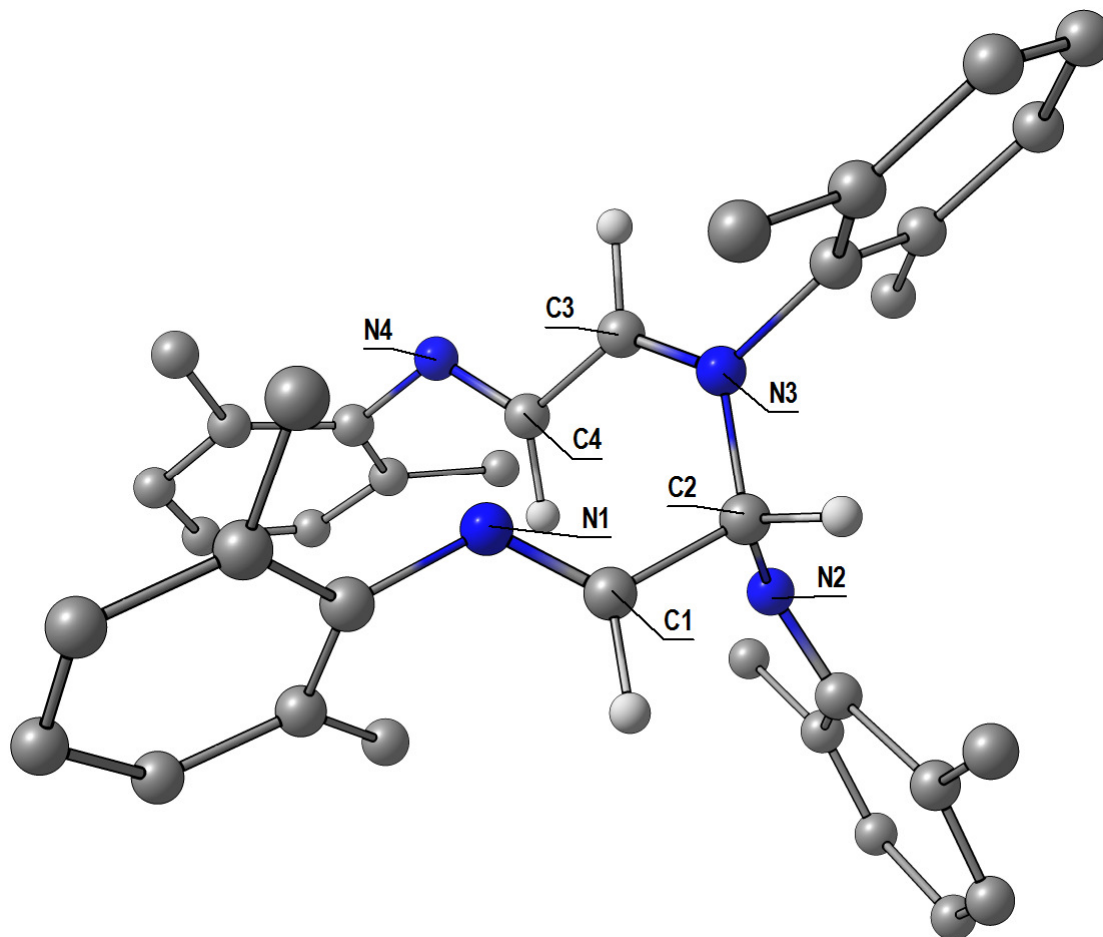

**Figure SI-4.** DFT-optimized geometry of  $[\text{WCl}_5\{\text{N}(\text{Ar})\text{C}(\text{CHN}\text{Xyl})\text{NXyl}[\text{CHCHN}\text{Xyl}]\}]^+$  (C-PCM/ $\omega$ B97X calculations) and spin density surface (isovalue = 0.01 a.u.). Hydrogen atoms on the Xyl moieties are omitted for clarity. Colour map: W, orange; Cl, green; N, blue; C, grey; H, white; spin density surface: yellow tones. Selected computed lengths ( $\text{\AA}$ ): C1-N1 1.265, C2-N2 1.256, C2-N3 1.464, C3-N3 1.291, C4-N4 1.271, C1-C2 1.491, C3-C4 1.471, W-Cl (average) 2.294, W---N2 4.307.

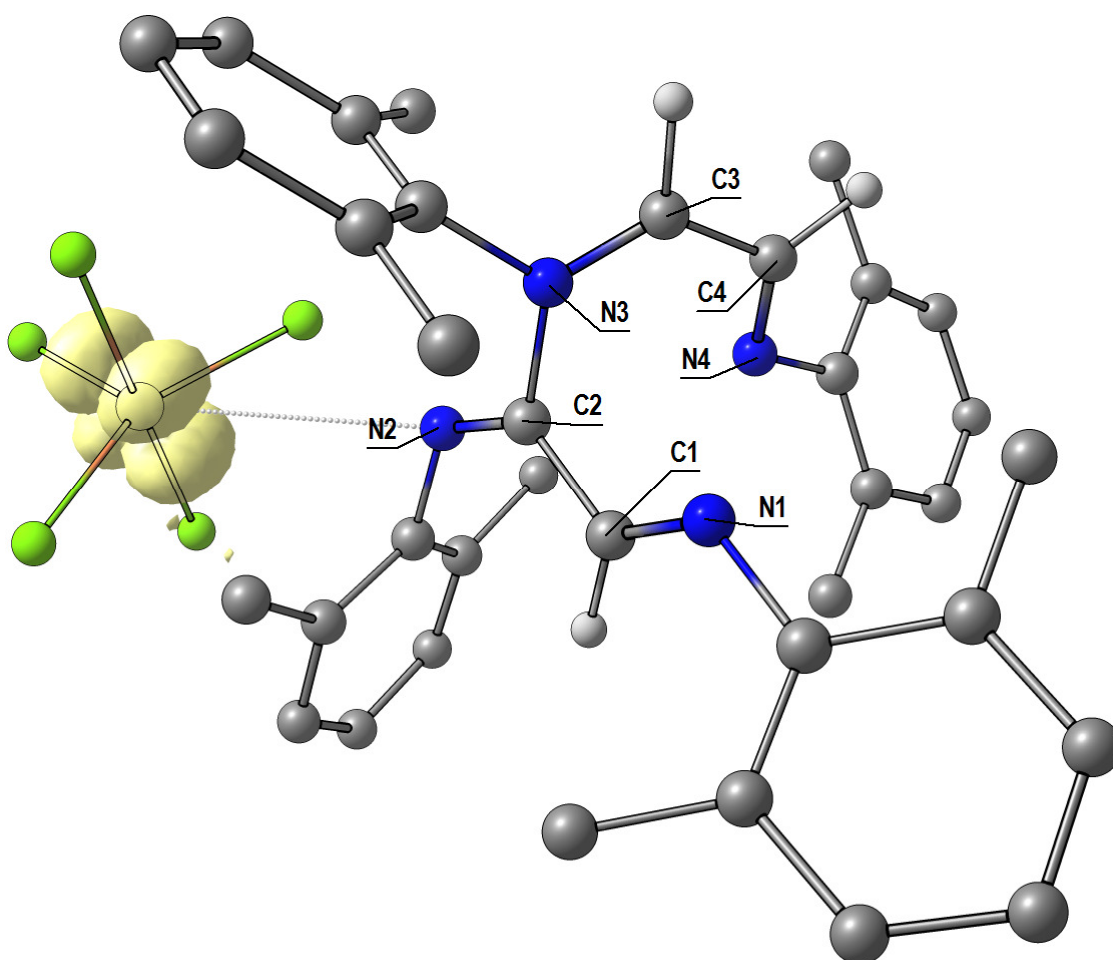

**Figure SI-5.** DFT-optimized geometry of  $\text{WCl}_4(\text{NCIXyl})$  and  $[\text{XylINCHCHN}(\text{Xyl})\text{C}(\text{Cl})\text{CHN}(\text{Xyl})]^{+}$  (C-PCM/ $\omega$ B97X calculations) and spin density surface (isovalue = 0.01 a.u.). Hydrogen atoms on the Xyl moieties are omitted for clarity. Colour map: W, orange; Cl, green; N, blue; C, grey; H, white; spin density surface: yellow tones. Selected computed lengths (Å): C1-N1 1.284, C2-Cl 1.689, C2-N3 1.355, C3-N3 1.354, C4-N4 1.296, C1-C2 1.449, C3-C4 1.430, W-Cl (average) 2.341, W-N2 1.693.

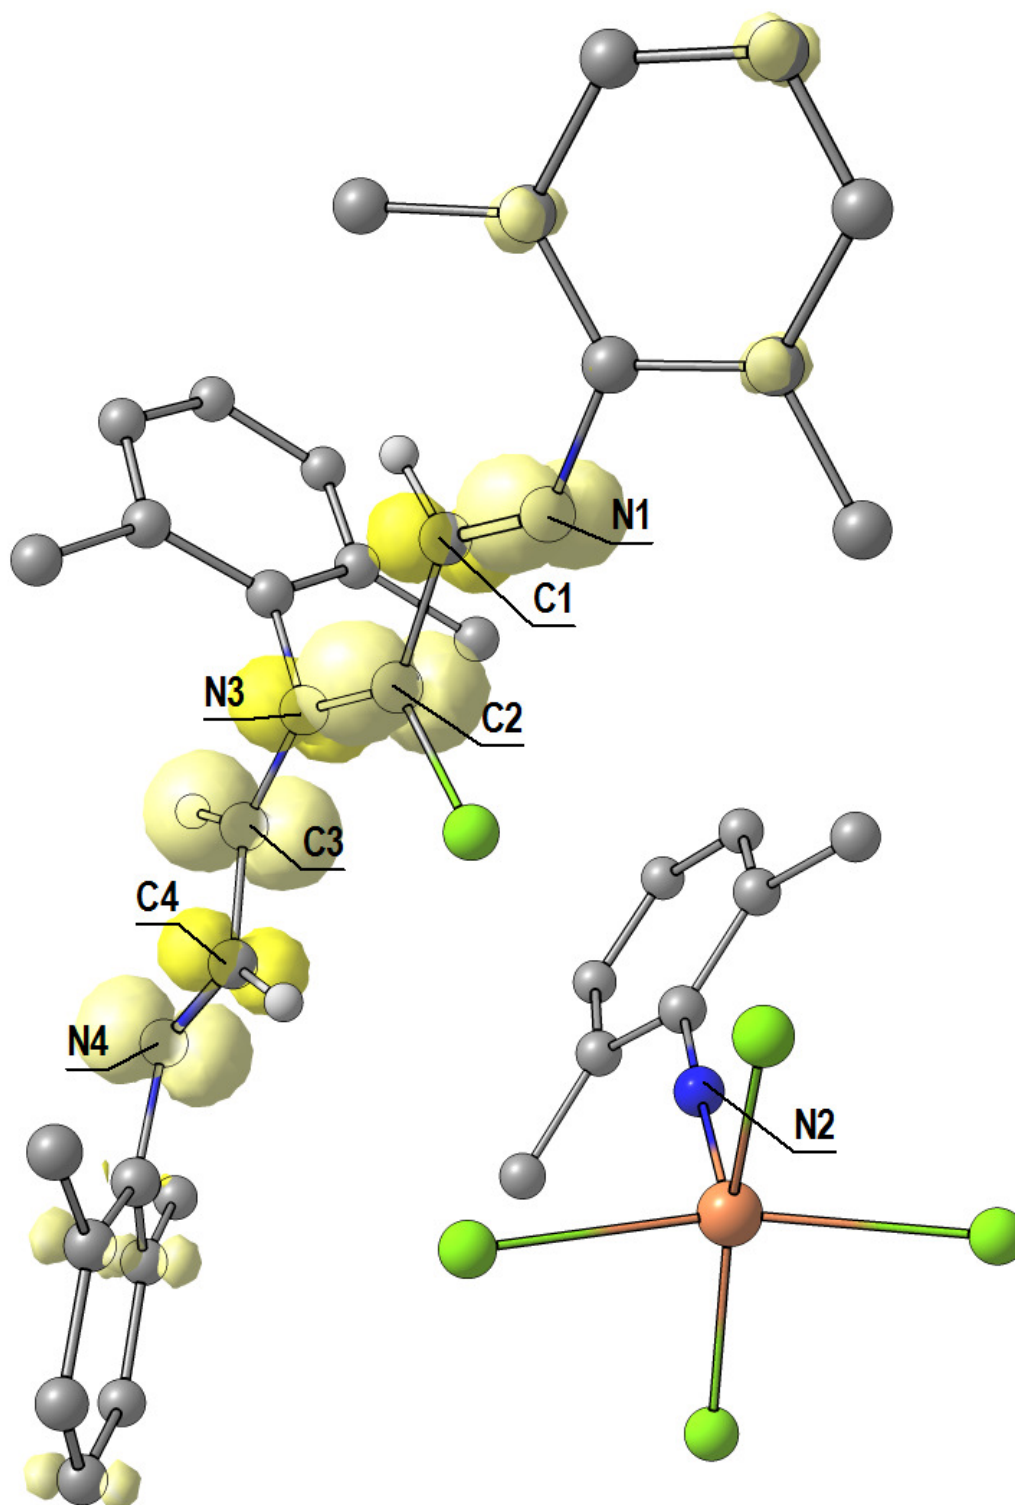

Supplement: c8nj00846a2.pdf [file c8nj00846a2.pdf]
